# Supplementary material
Source: publisher figshare collection journal article supplement (https://karger.figshare.com/ndownloader/files/14074631)
Supplement: Supplementary file 1 [file 14074631]

Supplementary table 1. Agreement among scores analyzed by kappa index

|  | **Sarli** | **Telem** | **Sun** | **Menezes** | **Soltan** | **Huguier** |
| --- | --- | --- | --- | --- | --- | --- |
| **Sarli** | 1 | 0.051  (-0.104;0.205) | 0.467  (0.342;0.591) | 0.523  (0.4;0.645) | 0.453  (0.332;0.575) | -0.108  (-0.26;0.044) |
| **Telem** | 0.051  (-0.104;0.205) | 1 | 0.027  (-0.088;0.143) | 0.016  (-0.074;0.105) | 0.058  (-0.107;0.223) | 0.008  (-0.057;0.072) |
| **Sun** | 0.467  (0.342;0.591) | 0.027  (-0.088;0.143) | 1 | 0.684  (0.577;0.790) | 0.614  (0.507;0.721) | -0.091  (-0.25;0.068) |
| **Menezes** | 0.523  (0.4;0.645) | 0.016  (-0.074;0.105) | 0.684  (0.577;0.790) | 1 | 0.419  (0.3;0.537) | 0.001  (-0.188;0.19) |
| **Soltan** | 0.453  (0.332;0.575) | 0.058  (-0.107;0.223) | 0.614  (0.507;0.721) | 0.419  (0.3;0.537) | 1 | -0.018  (-0.14;0.103) |
| **Huguier** | -0.108  (-0.26;0.044) | 0.008  (-0.057;0.072) | -0.091  (-0.25;0.068) | 0.001  (-0.188;0.19) | -0.018  (-0.14;0.103) | 1 |
